# Supplementary material for: A simple synthesis of sulfur-doped graphene using sulfur powder by chemical vapor deposition
Source: Royal Society of Chemistry journal article supplement (doi:10.1039/c6ra02109c), 2016-01-01
Supplement: c6ra02109c1.pdf [file c6ra02109c1.pdf]

Supporting Informations

**A simple synthesis of sulfur-doped graphene using sulfur powder by chemical vapor  
deposition**

Fahimeh Hassani, Hossein Tavakol\*, Fariba Keshavarzipour, Amin Javaheri.

Corresponding author: H. Tavakol; Department of Chemistry, Isfahan University of  
Technology, Isfahan 84156-83111, Iran.

Tell: +98-3133913241; Fax: +98-3133912350

Email: [hosein\\_ta@yahoo.com](mailto:hosein_ta@yahoo.com) , [h\\_tavakol@cc.iut.ac.ir](mailto:h_tavakol@cc.iut.ac.ir)

## **More details concerning utilized techniques:**

### **FESEM, elemental mapping and EDS:**

---

Instrument: Mira 3-XMU FE-SEM

Company: Tescan Co, Brno, Czech Republic

Operating Voltage: 15 kV

Detectors: BSE (Back-scattered electron), In-Beam BSE and In-Beam secondary electron detector

Max resolution:  $7.0 \times 10^6$

### **TEM:**

---

Instrument: EM208S TEM micro-scope

Company: Philips Co, The Netherland

Operating Voltage: 120.0 kV

Resolution: 2 nm

Imaging modes: BF (bright field) and diffraction

### **XRD:**

---

Instrument: XPERT

Company: Philips Co, The Netherland

Operating Voltage: 40 kV

Current: 30 mA

Radiation sources: Line  $K_{\alpha}$  of Cu

### **XPS:**

---

Instrument: Specs model EA10 plus

Company: Bestec Co, Germany

Operating Voltage: 15 kV

Radiation sources: Line  $K_{\alpha}$  of Al

Detecting elements: All except H and He

### **Raman spectroscopy:**

---

Instrument: Senterra

Company: Bruker Co, USA

Laser excitation: 514 nm

Operating Voltage: 15 kV

Detectors: CCD, point to point analysis

Sample: Powder and solid films

### **Adsorption-desorption experiments:**

---

Instrument: Finesorb 3010

Company: Finetec Co, China

Operating temperature:  $-196^{\circ}\text{C}$

Pore size analyzing: 1-100 nm
